# Supplementary material for: Microbial Type IA Topoisomerase C-Terminal Domain Sequence Motifs, Distribution and Combination
Source: MDPI journal article supplement (doi:10.3390/ijms23158709), 2022-08-05
Supplement: s1 [file s1]

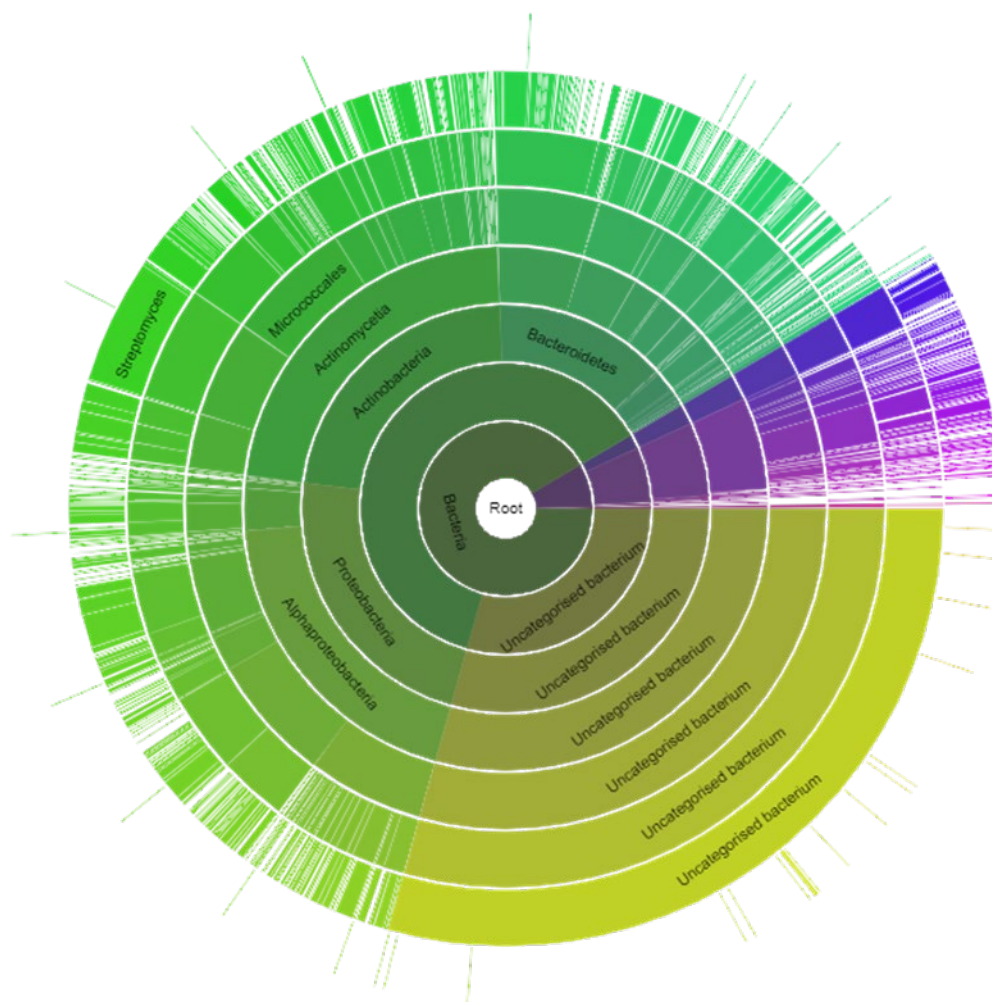

Figure S1. Sunburst illustration of species with Topo\_C\_Rpt. n=4235 (from [http://pfam.xfam.org/family/Toprim\\_C\\_rpt#tabview=tab7](http://pfam.xfam.org/family/Toprim_C_rpt#tabview=tab7)). Color assignments: Green – Bacteria, Purple – Eukaryota.

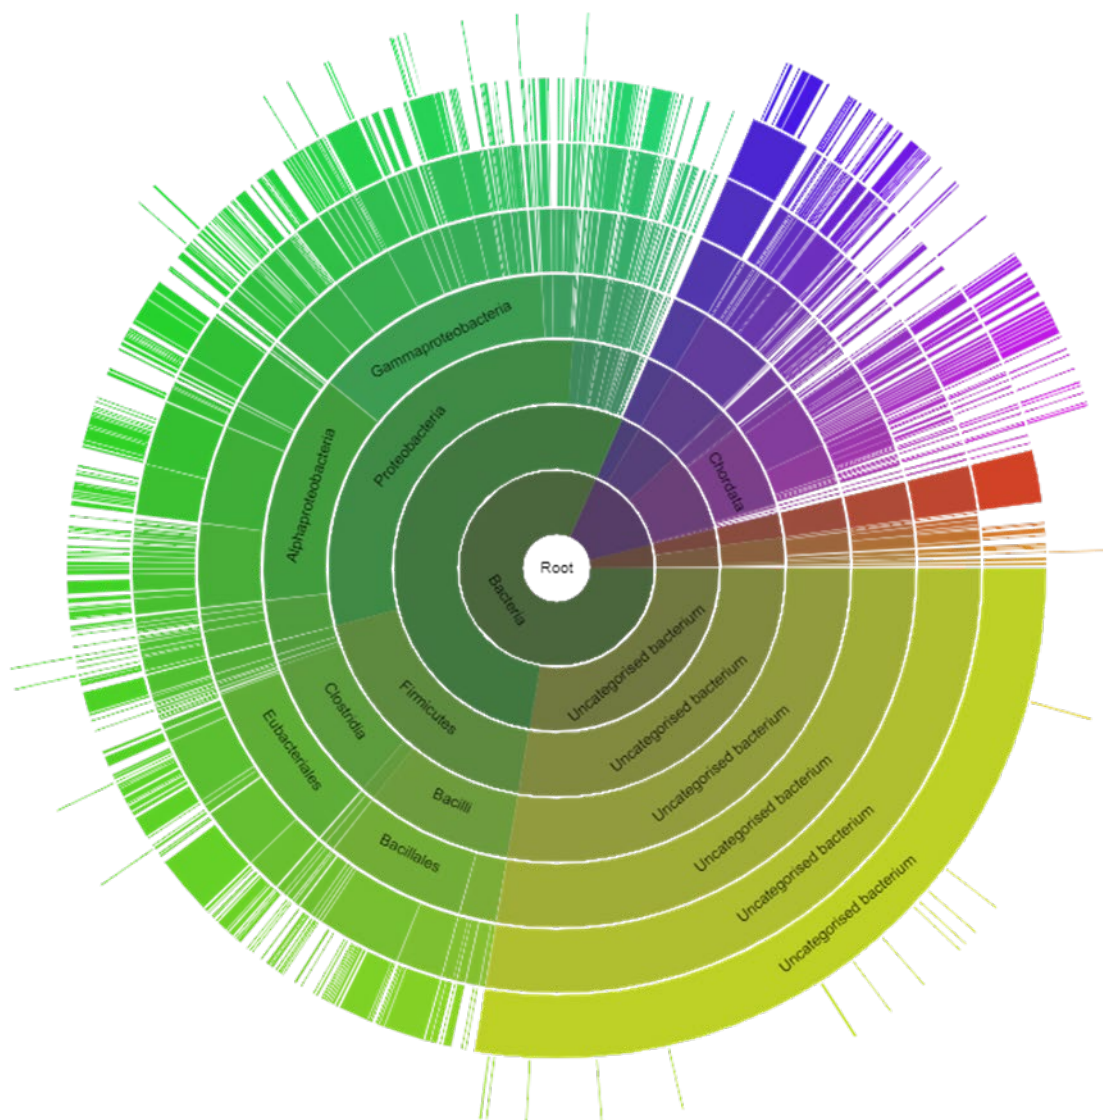

Figure S2. Sunburst illustration of species with Topo\_C\_ZnRpt. n=5401 (from [http://pfam.xfam.org/family/zf-C4\\_Topoiso#tabview=tab7](http://pfam.xfam.org/family/zf-C4_Topoiso#tabview=tab7)). Color assignments: Green – Bacteria, Purple – Eukaryota, Orange - Archea.

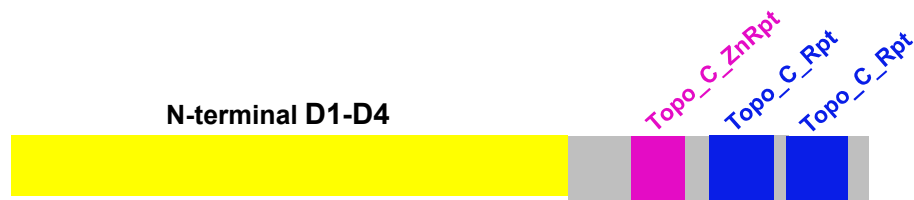

**TopA with one Topo\_C\_ZnRpt followed by two Topo\_C\_Rpt domains**

Examples of bacterial species: *Rickettsia bellii*, *Candidatus Phycorickettsia trachydisci*

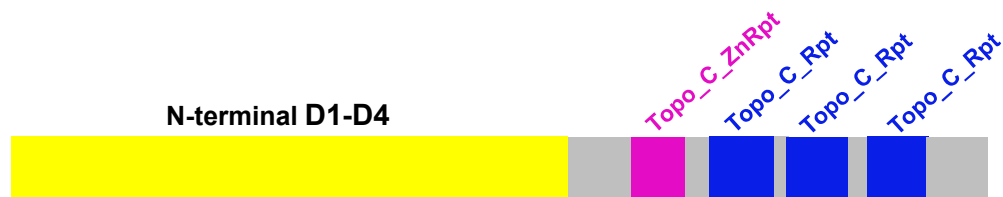

**TopA with one Topo\_C\_ZnRpt followed by three Topo\_C\_Rpt domains**

Examples of bacterial species: *Caulobacter crescentus*, *Gallionella capsiferriformans*

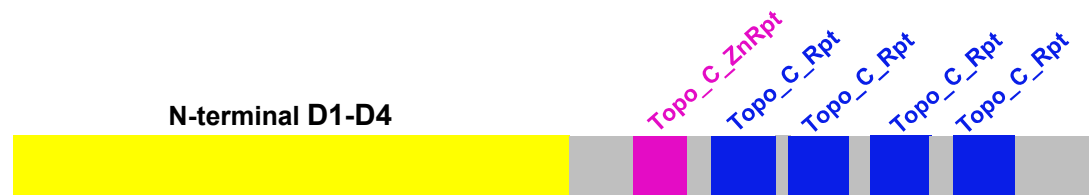

**TopA with one Topo\_C\_ZnRpt followed by four Topo\_C\_Rpt domains**

Examples of bacterial species: *Methylocapsa palsarum*, *Roseiarcus fermentans*

**Figure S3. Arrangements of Topo\_C\_ZnRpt and Topo\_C\_Rpt C-terminal domains in TopA from bacterial species found to have both types of C-terminal domains**

### Human Top3A

#### Topo\_C\_ZnRpt domains

653 EPIRKCPQCNKDMVLKTKKN-----GGFYLS~~CMGF~~PECRSAVWLPDSVLEAS  
700 RDSSVCPV~~CQ~~PHPVYRLKLFKRGSLPPTMPLE~~FVCC~~IGGCDDTLREILDLRFS

#### Zf-GRE domains

807 ESNSVT~~CN~~CGQEAVLLTVRKEGPNRGRQFFK~~CN~~GGSCNFFLWADSPNP  
891 SGSGTS~~CL~~CSQPSVTRTVQKDGP~~NCGRQ~~FHTCAKPREQQCGFFQWVDENTAP

#### CCHC domain

979 KKPRKCSLCHQPGHTRPFCPQNR

### Human Top3B

#### C4-type zinc fingers

615 AATGKPLSR~~CGK~~CHRFMKYIQ-----AKPSRLH~~CSH~~CDETYTLPQNGTIKLYKELR~~C~~PLDD  
679 GSRGKSYPLCPY~~CYN~~HPPFRD-----MKKGMGCNE~~C~~THPSCQH  
717 SLSMLGIGQCVE~~CE~~SGVLVLDPTS-----GPKWKV~~CNK~~CNVVAH~~C~~FENA  
762 HRVRVSADTCSV~~CE~~AALLDVDFNKA~~SPL~~PGDETQHMGCVF~~C~~DPVFQELVELKHAAS~~C~~HPMH

#### RGG motif

824 RGGPGRRQGRGRARRPPGKPNRRPK

Figure S4. C-terminal domains in human type IA topoisomerases. The RGG motif in Top3B is important for RNA binding.

| Bacteria                                                   | Topo_C_ZnRpt | Topo_C_Rpt |
|------------------------------------------------------------|--------------|------------|
| <b>Cyanobacteria</b>                                       |              |            |
| ▣ <u>Gloeocapsa sp. PCC 7428</u>                           | 0            | 3          |
| ▣ <u>Synechococcus elongatus PCC 7942 = FACHB-805</u>      | 0            | 4          |
| <b>Bacteroidetes</b>                                       |              |            |
| ▣ <u>Rhodocytophaga rosea</u>                              | 0            | 3          |
| <b>Flavobacteriaceae</b>                                   |              |            |
| ▣ <u>Formosa sp. Hel1_31_208</u>                           | 0            | 2          |
| ▣ <u>Spongiivirga citrea</u>                               | 0            | 2          |
| ▣ <u>Aurantibacter aestuarii</u>                           | 0            | 2          |
| ▣ <u>Mangrovimonas yunxiaonensis</u>                       | 0            | 2          |
| ▣ <u>Flavobacterium fontis</u>                             | 0            | 2          |
| ▣ <u>Winogradskyella sp. PG-2</u>                          | 0            | 2          |
| ▣ <u>Rhodothermus marinus DSM 4252</u>                     | 0            | 3          |
| <b>Chlamydia</b>                                           |              |            |
| ▣ <u>Chlamydia pneumoniae</u>                              | 3            | 0          |
| ▣ <u>Chlamydia trachomatis D/UW-3/CX</u>                   | 3            | 0          |
| <b>Actinobacteria</b>                                      |              |            |
| ▣ <u>Berryella intestinalis</u>                            | 3            | 0          |
| <b>Actinomycetia</b>                                       |              |            |
| ▣ <u>Streptomyces</u>                                      |              |            |
| ▣ <u>Streptomyces inhibens</u>                             | 0            | 4          |
| ▣ <u>Streptomyces coelicolor A3(2)</u>                     | 0            | 4          |
| ▣ <u>Mycobacterium</u>                                     |              |            |
| ▣ <u>Mycobacterium avium subsp. avium 2285 (R)</u>         | 0            | 1          |
| ▣ <u>Mycobacterium tuberculosis H37Rv</u>                  | 0            | 4          |
| <b>Proteobacteria</b>                                      |              |            |
| <b>Alphaproteobacteria</b>                                 |              |            |
| ▣ <u>Candidatus Cytothobacter primus</u>                   | 1            | 2          |
| <b>Rhodospirillales</b>                                    |              |            |
| ▣ <u>Caenispirillum bisanense</u>                          | 1            | 3          |
| ▣ <u>Roseomonas cervicalis ATCC 49957</u>                  | 1            | 3          |
| <b>Rhodobacterales</b>                                     |              |            |
| ▣ <u>Albimonas donghaensis</u>                             | 1            | 3          |
| <b>Roseobacteraceae</b>                                    |              |            |
| ▣ <u>Sulfitobacter mediterraneus</u>                       | 1            | 3          |
| ▣ <u>Rubellimicrobium mesophilum DSM 19309</u>             | 1            | 3          |
| <b>Hyphomicrobiales</b>                                    |              |            |
| <b>Beijerinckia</b>                                        |              |            |
| ▣ <u>Beijerinckia sp. 28-YEA-48</u>                        | 1            | 4          |
| ▣ <u>Methylocapsa palsarum</u>                             | 1            | 4          |
| ▣ <u>Roseiarcus fermentans</u>                             | 1            | 4          |
| <b>Methylocystaceae</b>                                    |              |            |
| ▣ <u>Methylosinus sp. R-45379</u>                          | 1            | 4          |
| ▣ <u>Methylocystis sp. SC2</u>                             | 1            | 4          |
| ▣ <u>Aquamicrobium defluvii</u>                            | 1            | 3          |
| ▣ <u>Agrobacterium fabrum str. C58</u>                     | 1            | 3          |
| ▣ <u>Rickettsia bellii RML369-C</u>                        | 1            | 2          |
| ▣ <u>Zymomonas mobilis subsp. mobilis ZM4 = ATCC 31821</u> | 1            | 3          |
| ▣ <u>Caulobacter vibrioides CB15</u>                       | 1            | 3          |
| ▣ <u>Helicobacter pylori 26695</u>                         | 3            | 0          |
| <b>Gammaproteobacteria</b>                                 |              |            |
| ▣ <u>Xylella fastidiosa 9a5c</u>                           | 0            | 3          |
| ▣ <u>Escherichia coli K-12</u>                             | 3            | 0          |
| <b>Firmicutes</b>                                          |              |            |
| <b>Bacilli</b>                                             |              |            |
| <b>Lactobacillales</b>                                     |              |            |
| ▣ <u>Lactiplantibacillus plantarum</u>                     | 2            | 0          |
| ▣ <u>Enterococcus faecalis</u>                             | 3            | 0          |
| ▣ <u>Streptococcus pneumoniae</u>                          | 3            | 0          |
| <b>Bacillales</b>                                          |              |            |
| ▣ <u>Listeria monocytogenes serotype 4b str. LL195</u>     | 3            | 0          |
| <b>Bacillaceae</b>                                         |              |            |
| ▣ <u>Halalkalibacterium halodurans C-125</u>               | 3            | 0          |
| ▣ <u>Bacillus subtilis subsp. subtilis str. 168</u>        | 3            | 0          |
| ▣ <u>Staphylococcus aureus subsp. aureus NCTC 8325</u>     | 3            | 0          |
| <b>Eubacteriales</b>                                       |              |            |
| ▣ <u>Sulfolobus acidophilus DSM 10332</u>                  | 3            | 0          |
| ▣ <u>Clostridioides difficile 630</u>                      | 3            | 0          |
| ▣ <u>Caldilinea aerophila DSM 14535 = NBRC 104270</u>      | 0            | 3          |
| ▣ <u>Thermotoga maritima MSB8</u>                          | 1            | 0          |
| ▣ <u>Deinococcus radiodurans R1</u>                        | 0            | 4          |
| ▣ <u>Borrelia burgdorferi B31</u>                          | 0            | 1          |
| ▣ <u>Aquifex aeolicus VF5</u>                              | 0            | 0          |

Figure S5. Taxonomy common tree of select bacterial species to illustrate the distribution of Topo\_C\_ZnRpt and Topo\_C\_Rpt repeats in bacterial topoisomerase I. The number of the repeats found in the TopA C-terminal region are indicated next to the species.



| Fungi                                                             | zf-GRF<br>3 | zf-CCHC<br>1 |
|-------------------------------------------------------------------|-------------|--------------|
| ▣ <a href="#">Rozeella allomyces CSF55</a>                        |             |              |
| Microsporidia                                                     |             |              |
| ▣ <a href="#">Nematocida parisii ERTm1</a>                        | 2           | 0            |
| Enterocytozoonidae                                                |             |              |
| ▣ <a href="#">Enterospora canceri</a>                             | 1           | 0            |
| ▣ <a href="#">Hepatospora eriocheir</a>                           | 0           | 0            |
| ▣ <a href="#">Enterocytozoon hepatopenaei</a>                     | 1           | 0            |
| ▣ <a href="#">Nosema bombycis CQ1</a>                             | 2           | 0            |
| Ascomycota                                                        |             |              |
| Leotiomycetes                                                     |             |              |
| ▣ <a href="#">Pseudogymnoascus verrucosus</a>                     | 0           | 0            |
| ▣ <a href="#">Blumeria hordei DH14</a>                            | 0           | 0            |
| ▣ <a href="#">Botrytis cinerea B05.10</a>                         | 0           | 0            |
| Saccharomycetales                                                 |             |              |
| ▣ <a href="#">[Candida] auris</a>                                 | 0           | 0            |
| ▣ <a href="#">Cyberlindnera jadinii NRRL Y-1542</a>               | 0           | 0            |
| ▣ <a href="#">Saccharomyces cerevisiae S288C</a>                  | 0           | 0            |
| ▣ <a href="#">Scheffersomyces stipitis CBS 6054</a>               | 0           | 0            |
| ▣ <a href="#">Protomyces lactucae-debilis</a>                     | 0           | 0            |
| Hypocreales                                                       |             |              |
| ▣ <a href="#">Metarhizium rileyi</a>                              | 0           | 0            |
| ▣ <a href="#">Fusarium oxysporum f. sp. cubense</a>               | 0           | 0            |
| Dothideomycetes                                                   |             |              |
| ▣ <a href="#">Lasiodiplodia theobromae</a>                        | 0           | 0            |
| ▣ <a href="#">Bipolaris victoriae FI3</a>                         | 0           | 0            |
| ▣ <a href="#">Zymoseptoria tritici IPO323</a>                     | 0           | 0            |
| Aspergillaceae                                                    |             |              |
| ▣ <a href="#">Penicillium brasilianum</a>                         | 0           | 0            |
| ▣ <a href="#">Monascus purpureus</a>                              | 0           | 0            |
| Aspergillus                                                       |             |              |
| ▣ <a href="#">Aspergillus niger CBS 513.88</a>                    | 0           | 0            |
| ▣ <a href="#">Aspergillus flavus NRRL3357</a>                     | 0           | 0            |
| ▣ <a href="#">Aspergillus fumigatus Af293</a>                     | 0           | 0            |
| ▣ <a href="#">Xylona heveae TC161</a>                             | 0           | 0            |
| Pneumocystis                                                      |             |              |
| ▣ <a href="#">Pneumocystis jirovecii RU7</a>                      | 0           | 0            |
| ▣ <a href="#">Pneumocystis murina B123</a>                        | 0           | 0            |
| Orbiliaceae                                                       |             |              |
| ▣ <a href="#">Dactylellina haptotyla CBS 200.50</a>               | 0           | 0            |
| ▣ <a href="#">Orbilia oligospora ATCC 24927</a>                   | 0           | 0            |
| Pezizales                                                         |             |              |
| ▣ <a href="#">Pyronema omphalodes CBS 100304</a>                  | 0           | 0            |
| ▣ <a href="#">Tuber melanosporum Mel28</a>                        | 0           | 0            |
| ▣ <a href="#">Schizosaccharomyces pombe 972h-</a>                 | 0           | 0            |
| Chytridiomycota                                                   |             |              |
| ▣ <a href="#">Neocallimastix californiae</a>                      | 0           | 0            |
| Chytridiomycetes                                                  |             |              |
| ▣ <a href="#">Batrachochytrium dendrobatidis JEL423</a>           | 2           | 0            |
| ▣ <a href="#">Spizellomyces punctatus DAOM BR117</a>              | 1           | 0            |
| ▣ <a href="#">Gonapodya prolifera JEL478</a>                      | 2           | 0            |
| Mucoromycota                                                      |             |              |
| Mucorales                                                         |             |              |
| ▣ <a href="#">Choanephora cucurbitarum</a>                        | 2           | 0            |
| ▣ <a href="#">Rhizopus azygosporus</a>                            | 2           | 0            |
| ▣ <a href="#">Rhizophagus irregularis DAOM 181602=DAOM 197198</a> | 0           | 0            |
| Basidiomycota                                                     |             |              |
| Dacrymycetaceae                                                   |             |              |
| ▣ <a href="#">Dacryopinax primogenitus</a>                        | 2           | 0            |
| ▣ <a href="#">Calocera viscosa TUFC12733</a>                      | 0           | 0            |
| Malassezia                                                        |             |              |
| ▣ <a href="#">Malassezia vespertilionis</a>                       | 0           | 0            |
| ▣ <a href="#">Malassezia sympodialis ATCC 42132</a>               | 1           | 1            |
| ▣ <a href="#">Malassezia globosa CBS 7966</a>                     | 0           | 0            |
| ▣ <a href="#">Malassezia restricta CBS 7877</a>                   | 0           | 0            |
| Tremellomycetes                                                   |             |              |
| Tremellales                                                       |             |              |
| ▣ <a href="#">Saitozyma podzolica</a>                             | 2           | 1            |
| ▣ <a href="#">Cryptococcus neoformans var. neoformans JEC21</a>   | 2           | 1            |
| ▣ <a href="#">Aniotrachium porosum</a>                            | 1           | 0            |
| Agaricomycetes                                                    |             |              |
| ▣ <a href="#">Hypsizygus marmoreus</a>                            | 2           | 0            |
| Polyporales                                                       |             |              |
| ▣ <a href="#">Steccherinum ochraceum</a>                          | 1           | 3            |
| ▣ <a href="#">Grifola frondosa</a>                                | 1           | 2            |
| Microbotryomycetes                                                |             |              |
| ▣ <a href="#">Leucosporidium creatinivorum</a>                    | 2           | 2            |
| Sporidiobolaceae                                                  |             |              |
| ▣ <a href="#">Sporidiobolus salmonicolor</a>                      | 1           | 0            |
| ▣ <a href="#">Rhodotorula graminis WP1</a>                        | 2           | 3            |
| ▣ <a href="#">Wallemia ichthyophaga EXF-994</a>                   | 1           | 1            |
| ▣ <a href="#">Mixia osmundae IAM 14324</a>                        | 2           | 0            |
| Ustilaginaceae                                                    |             |              |
| ▣ <a href="#">Sporisorium reilianum SRZ2</a>                      | 2           | 2            |
| ▣ <a href="#">Ustilago maydis 521</a>                             | 2           | 2            |
| ▣ <a href="#">Puccinia graminis f. sp. tritici</a>                | 2           | 3            |
| Zoopagomycota                                                     |             |              |
| ▣ <a href="#">Basidiobolus meristosporus CBS 931.73</a>           | 0           | 0            |
| ▣ <a href="#">Conidiobolus coronatus NRRL 28638</a>               | 0           | 0            |
| ▣ <a href="#">Coemansia reversa NRRL 1564</a>                     | 2           | 1            |
| ▣ <a href="#">Allomyces macrogynus ATCC 38327</a>                 | 1           | 0            |

Figure S6. Taxonomy common tree of select fungi species to illustrate the distribution of zf-GRF and zf-CCHC repeats in fungal topoisomerase III. The number of the repeats found in the Top3 C-terminal region are indicated next to the species.
